# Supplementary material
Source: PubMed Central journal article supplement (PMC8628222)
Supplement: NIHMS1733503-supplement-1.pdf [file NIHMS1733503-supplement-1.pdf]

## **Supplemental Figures**

### **Curcumin Inhibition of TGF $\beta$ signaling in bone metastatic breast cancer cells and the possible role of oxidative metabolites**

Andrew G. Kunihiro, Julia A. Brickey, Jennifer B. Frye, Julia N. Cheng, Paula B. Luis, Claus Schneider, Janet L. Funk

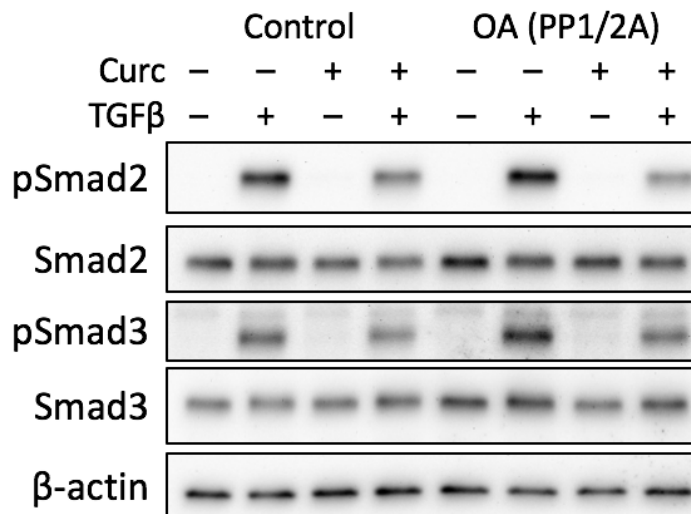

**Figure S1: Effect of phosphatase inhibition on TGF $\beta$ -stimulated pSmad2/3 levels in control vs. curcumin-treated cells.** Effect of okadaic acid pre-treatment (OA, 10 nM, 1 hour) on curcumin (30  $\mu$ M, 16 h pre-treatment) inhibition of TGF $\beta$ -stimulated Smad2/3 phosphorylation in MDA-SA cells.

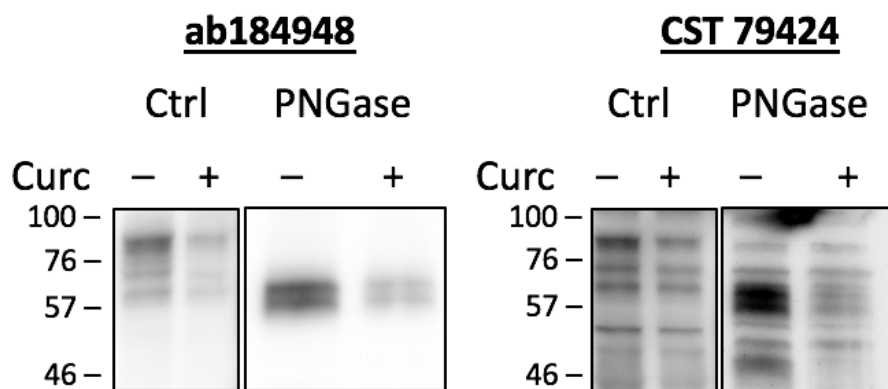

**Figure S2. Western analysis of curcumin effects on TGF $\beta$ R2.** Effects of curcumin (30  $\mu$ M for 4h) on TGF $\beta$ R2 protein levels were determined by Western analysis using antibodies directed against two different TGF $\beta$ R2 epitopes [80] (extracellular domain [ab184948], and intracellular domain [CST 79424]), including treatment of samples with PNGase F to document collapse of bands into an anticipated 60 kD protein [51] following removal of N-linked glycosylation.

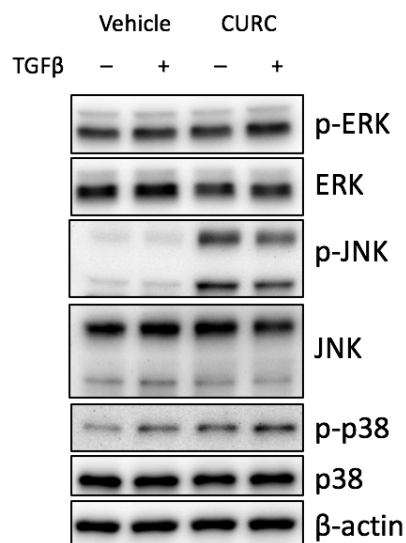

**Figure S3. Curcumin effects on MAPK signaling pathways in MDA-SA cells.** Western blot analysis of MDA-SA cells following curcumin treatment (30  $\mu$ M, 16h pre-treatment) and/or TGF $\beta$  stimulation (1h). Representative of at least 3 experiments.

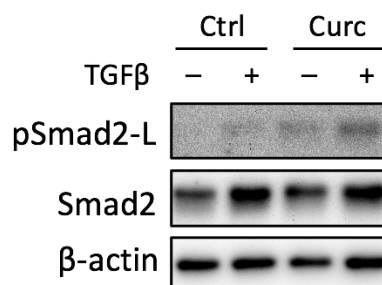

**Figure S4: Early phosphorylation of Smad2 linker region.** Western blot analysis of Smad2 linker region phosphorylation in MDA-SA cells following 4h of curcumin (30  $\mu$ M) pretreatment followed by 1h of concurrent TGF $\beta$ . Representative of at least 3 experiments.

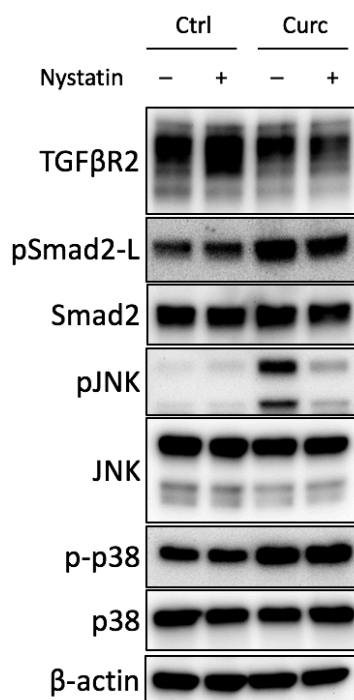

**Figure S5. Nystatin increases TGFβR2 while inhibiting JNK activation and Smad2-L phosphorylation.** MDA-SA cells were pre-treated with nystatin (50 μg/mL) for 1h followed by curcumin (30 μM) for 4 hours. Representative of n=2 blots.

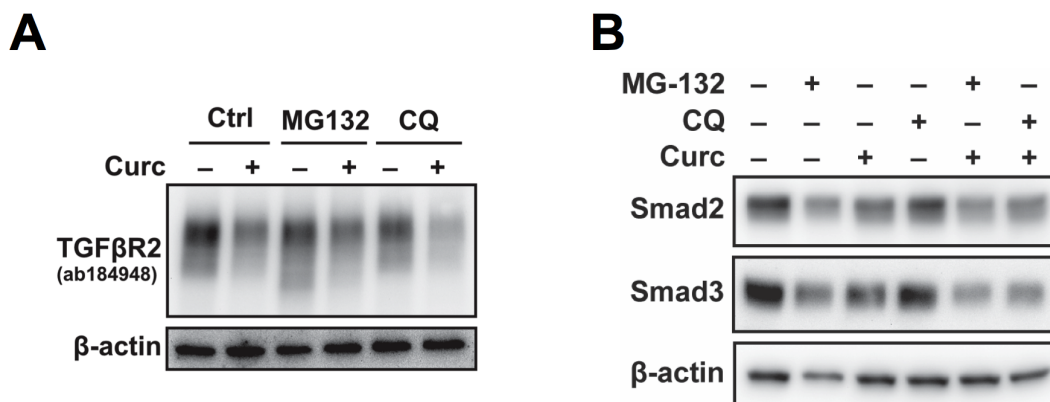

**Figure S6. Effect of degradative pathway inhibitors on curcumin-induced decreases in TGFβR2 and R-Smads.** Effect of lysosomal inhibitor chloroquine (CQ, 40 μM) or proteasomal inhibitor MG-132 (10 μM) on curcumin-mediated decreases in **A**) TGFβR2 (2 h pre-treatment, followed by 4h concurrent curcumin) or **B**) Smad2/3 protein levels (3h pre-treatment, followed by 16h concurrent curcumin).

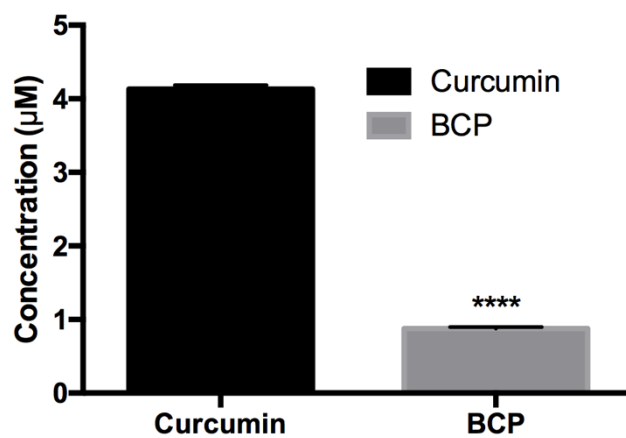

**Figure S7: Oxidation of curcumin by MDA-SA cells.** MDA-SA cells were incubated with aglycone curcumin (10 µM) for 4 hours at 37°C in media. Curcumin and its stable end product of oxidative metabolism, bicyclopentadione (BCP) were analyzed by LC/MS (n=8/group). Significance tested with a paired t-test. \*\*\*\* p < 0.0001.
